# Supplementary material for: Excessive Sodium Intake Leads to Cardiovascular Disease by Promoting Sex-Specific Dysfunction of Murine Heart
Source: Front Nutr. 2022 Jul 1;9:830738. doi: 10.3389/fnut.2022.830738 (PMC9285006; doi:10.3389/fnut.2022.830738)
Supplement: Supplementary file 4 [file Table_4.XLSX]

## Sheet: Sheet1
GO_F Term ID	GO_F Term Desc	GO_F Term Level1	GO_F Term Level2	Rich Ratio	Q value
GO:0005161	platelet-derived growth factor receptor binding	molecular_function	binding	0.133333	0.0030761
GO:0001968	fibronectin binding	molecular_function	binding	0.0645161	0.00677569
GO:0005018	platelet-derived growth factor alpha-receptor activity	molecular_function	catalytic activity	1	0.0135847
GO:0045029	UDP-activated nucleotide receptor activity	molecular_function	molecular transducer activity	1	0.0135847
GO:0001605	adrenomedullin receptor activity	molecular_function	molecular transducer activity	0.25	0.0151901
GO:0001621	ADP receptor activity	molecular_function	molecular transducer activity	0.333333	0.0151901
GO:0001846	opsonin binding	molecular_function	binding	0.5	0.0151901
GO:0003857	3-hydroxyacyl-CoA dehydrogenase activity	molecular_function	catalytic activity	0.142857	0.0151901
GO:0004165	dodecenoyl-CoA delta-isomerase activity	molecular_function	catalytic activity	0.25	0.0151901
GO:0004528	phosphodiesterase I activity	molecular_function	catalytic activity	0.142857	0.0151901
GO:0004551	nucleotide diphosphatase activity	molecular_function	catalytic activity	0.166667	0.0151901
GO:0005021	vascular endothelial growth factor-activated receptor activity	molecular_function	catalytic activity	0.166667	0.0151901
GO:0005178	integrin binding	molecular_function	binding	0.0141844	0.0151901
GO:0008083	growth factor activity	molecular_function	binding	0.0130719	0.0151901
GO:0016509	long-chain-3-hydroxyacyl-CoA dehydrogenase activity	molecular_function	catalytic activity	0.5	0.0151901
GO:0016863	intramolecular oxidoreductase activity, transposing C=C bonds	molecular_function	catalytic activity	0.333333	0.0151901
GO:0019103	pyrimidine nucleotide binding	molecular_function	binding	0.25	0.0151901
GO:0019960	C-X3-C chemokine binding	molecular_function	binding	0.2	0.0151901
GO:0038085	vascular endothelial growth factor binding	molecular_function	binding	0.142857	0.0151901
GO:0038132	neuregulin binding	molecular_function	binding	0.166667	0.0151901
GO:0043237	laminin-1 binding	molecular_function	binding	0.166667	0.0151901
GO:0045030	UTP-activated nucleotide receptor activity	molecular_function	molecular transducer activity	0.333333	0.0151901
GO:0047391	alkylglycerophosphoethanolamine phosphodiesterase activity	molecular_function	catalytic activity	0.142857	0.0151901
GO:0097643	amylin receptor activity	molecular_function	molecular transducer activity	0.25	0.0151901
GO:1990430	extracellular matrix protein binding	molecular_function	binding	0.166667	0.0151901
GO:0004300	enoyl-CoA hydratase activity	molecular_function	catalytic activity	0.125	0.0160699
GO:0070851	growth factor receptor binding	molecular_function	binding	0.125	0.0160699
GO:0019531	oxalate transmembrane transporter activity	molecular_function	transporter activity	0.1	0.0193595
GO:0000900	translation repressor activity, mRNA regulatory element binding	molecular_function	binding	0.0833333	0.0197008
GO:0008135	translation factor activity, RNA binding	molecular_function	binding	0.0909091	0.0197008
GO:0008271	secondary active sulfate transmembrane transporter activity	molecular_function	transporter activity	0.0833333	0.0197008
GO:0015116	sulfate transmembrane transporter activity	molecular_function	transporter activity	0.0833333	0.0197008
GO:0048407	platelet-derived growth factor binding	molecular_function	binding	0.0833333	0.0197008
GO:0031994	insulin-like growth factor I binding	molecular_function	binding	0.0769231	0.0201175
GO:0045028	G protein-coupled purinergic nucleotide receptor activity	molecular_function	molecular transducer activity	0.0769231	0.0201175
GO:0070403	NAD+ binding	molecular_function	binding	0.0666667	0.0225555
GO:0015106	bicarbonate transmembrane transporter activity	molecular_function	transporter activity	0.0625	0.0234026
GO:0030247	polysaccharide binding	molecular_function	binding	0.0588235	0.0242044
GO:0008509	anion transmembrane transporter activity	molecular_function	transporter activity	0.0555556	0.0243402
GO:0015108	chloride transmembrane transporter activity	molecular_function	transporter activity	0.0555556	0.0243402
GO:0005521	lamin binding	molecular_function	binding	0.0526316	0.0244624
GO:0015301	anion:anion antiporter activity	molecular_function	transporter activity	0.0526316	0.0244624
GO:0004622	lysophospholipase activity	molecular_function	catalytic activity	0.0434783	0.0288924
GO:0015026	coreceptor activity	molecular_function	molecular transducer activity	0.0384615	0.0298571
GO:0017134	fibroblast growth factor binding	molecular_function	binding	0.0384615	0.0298571
GO:0045182	translation regulator activity	molecular_function	translation regulator activity	0.0384615	0.0298571
GO:0050431	transforming growth factor beta binding	molecular_function	binding	0.04	0.0298571
GO:0043548	phosphatidylinositol 3-kinase binding	molecular_function	binding	0.0344828	0.0325819
GO:0050840	extracellular matrix binding	molecular_function	binding	0.0294118	0.0373693
GO:0005245	voltage-gated calcium channel activity	molecular_function	transporter activity	0.025	0.0430149
